P2695

## ABSORB bioresorbable scaffold versus Xience metallic stent in acute coronary syndromes with treated with percutaneous coronary intervention. A subanalysis of the COMPARE-ABSORB trial

R.J. Van Geuns<sup>1</sup>, P.C. Smits<sup>2</sup>, C.C. Chang<sup>1</sup>, A. Włodarczyk<sup>3</sup>, B. Chevalier<sup>4</sup>, N. West<sup>5</sup>, T. Gori<sup>6</sup>, E. Barbato<sup>7</sup>, G. Tarantini<sup>8</sup>, V. Kocka<sup>9</sup>, S. Achenbach<sup>10</sup>, D. Dudek<sup>11</sup>, J. Escaned<sup>12</sup>, J. Tijssen<sup>13</sup>, Y. Onuma<sup>1</sup>

<sup>1</sup>Erasmus Medical Centre, Rotterdam, Netherlands (The); <sup>2</sup>Maasstad Hospital, Cardiology department, Rotterdam, Netherlands (The); <sup>3</sup>Miedziove Centrum Zdrowia, Department of Cardiology, Lubin, Poland; <sup>4</sup>Cardiovascular Institute Paris-Sud (ICPS), Massy, France; <sup>5</sup>Royal Papworth Hospital NHS Foundation Trust, Cambridge, United Kingdom; <sup>6</sup>Johannes Gutenberg University Mainz (JGU), Mainz, Germany; <sup>7</sup>Cardiovascular Center Aalst, Aalst, Belgium; <sup>8</sup>University of Padova, Padua, Italy; <sup>9</sup>Charles University of Prague, Prague, Czechia; <sup>10</sup>Friedrich Alexander University, Erlangen, Germany; <sup>11</sup>Jagiellonian University Medical College, 2nd Department of Cardiology, Krakow, Poland; <sup>12</sup>Hospital Clinic San Carlos, Madrid, Spain; <sup>13</sup>Academic Medical Center of Amsterdam, Amsterdam, Netherlands (The)

On behalf of the COMPARE ABSORB trial investigators

**Funding Acknowledgement:** Maasstad Hospital, Rotterdam, the Netherlands

**Background:** The safety and efficacy of the ABSORB scaffold in ACS patients remain unclear. The COMPARE-ABSORB trial compares the ABSORB to the Xience stent in lesions and patients at high risk for restenosis. Patients with STEMI and urgent PCI for non-STEMI were not excluded.

**Methods:** Patients included in the COMPARE-ABSORB trial undergoing PCI for ACS were eligible. Predefined implantation techniques for ABSORB was mandatory. Primary endpoint is target lesion failure (TLF) at 1 year, defined as a composite of cardiac death, target vessel myocardial infarction and clinically indicated target lesion revascularization.

**Results:** Of 1670 patients, 842 were treated for ACS. At 1-year, TLF oc-

curred in 22 patients (5.0%) of the ABSORB group and in 14 patients (3.5%) of the Xience group (HR 1.44%; 95% CI 0.74%-2.82%, P=0.284). Definite device thrombosis occurred in 9 patients (2.0%) of the ABSORB group and in 2 patients (0.5%) of the Xience group (HR 4.10%; 95% CI 0.89%-18.9%, P=0.071).

**Conclusion:** The COMPARE-ABSORB trial showed no difference in the primary endpoint at one year for the ACS subgroup. The signal for increased thrombosis remained, even with the optimized implantation protocol

Baseline characteristics

|                                           | ABSORB (n=442)  | XIENCE (n=400)  |
|-------------------------------------------|-----------------|-----------------|
| Age, years (SD)                           | 60.7 (9.6)      | 61.3 (9.1)      |
| Male                                      | 350/442 (79.2%) | 313/400 (78.3%) |
| Current smoker                            | 159/439 (36.2%) | 126/397 (31.7%) |
| Diabetes mellitus                         | 152/440 (34.5%) | 138/399 (34.6%) |
| Hypertension                              | 298/442 (67.4%) | 266/400 (66.5%) |
| Hypercholesterolemia                      | 255/442 (57.7%) | 232/400 (58.0%) |
| Family history of coronary artery disease | 147/442 (33.3%) | 103/400 (25.8%) |
| Previous MI                               | 61/442 (13.8%)  | 67/400 (16.8%)  |
| Established Peripheral Vascular Disease   | 27/442 (6.1%)   | 15/400 (3.8%)   |
| Previous PCI                              | 83/442 (18.8%)  | 86/400 (21.5%)  |
| Previous CABG                             | 1/442 (0.2%)    | 4/400 (1.0%)    |
| Previous stroke                           | 15/442 (3.4%)   | 21/400 (5.3%)   |
| Renal Insufficiency                       | 9/442 (2.0%)    | 13/400 (3.3%)   |
| Clinical presentation                     |                 |                 |
| Unstable angina                           | 149/442 (33.7%) | 141/400 (35.3%) |
| Non-ST elevation myocardial infarction    | 183/442 (41.4%) | 156/400 (39.0%) |
| ST elevation myocardial infarction        | 110/442 (24.9%) | 103/400 (25.7%) |

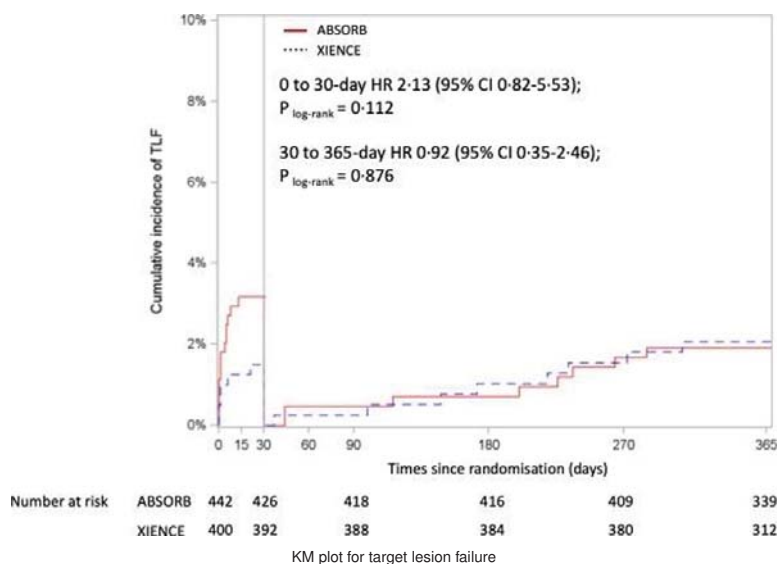

Source: http://academic.oup.com/eurheartj/article-pdf/40/Supplement_1/ehz748.1012/30203434/ehz748.1012.pdf
